# Supplementary material for: Epigenetic Regulation of Verticillium dahliae Virulence: Does DNA Methylation Level Play A Role?
Source: PubMed Central journal article supplement (PMC7432615; doi:10.3390/ijms21155197), 2020-07-22

## Epigenetic regulation of *Verticillium dahliae* virulence: does DNA methylation level play a role?

Jorge A. Ramírez-Tejero<sup>1</sup>, Carmen Gómez-Lama Cabanás<sup>2</sup>, Antonio Valverde-Corredor<sup>2</sup>, Jesús Mercado-Blanco<sup>2</sup> and Francisco Luque<sup>1\*</sup>

<sup>1</sup>Center for Advanced Studies in Olive Grove and Olive Oils, Department of Experimental Biology, Univ. Jaén, 23071-Jaén, Spain

<sup>2</sup>Department of Crop Protection, Institute for Sustainable Agriculture, Agencia Estatal Consejo Superior de Investigaciones Científicas (CSIC), Campus 'Alameda del Obispo', Avenida Menéndez Pidal s/n, Apartado 14004 Córdoba, Spain

Email: [irtejero@ujaen.es](mailto:irtejero@ujaen.es); [cgomezlama@ias.csic.es](mailto:cgomezlama@ias.csic.es); [valverde@ias.csic.es](mailto:valverde@ias.csic.es); [jesus.mercado@ias.csic.es](mailto:jesus.mercado@ias.csic.es); [fjluque@ujaen.es](mailto:fjluque@ujaen.es).

\*Corresponding author F. Luque, [fjluque@ujaen.es](mailto:fjluque@ujaen.es). ORCID ID: 0000-0003-1354-3533





























|               |                                                                         |      |      |             |               |      |        |              |               |      |       |             |               |      |       |              |
|---------------|-------------------------------------------------------------------------|------|------|-------------|---------------|------|--------|--------------|---------------|------|-------|-------------|---------------|------|-------|--------------|
| 8g0000050.1   | 5'-AMP-activated protein kinase subunit gamma                           | 2194 | 26,5 | 1,207839562 | 8g0000050.1   | 2194 | -67    | -3,053783045 | 8g0000050.1   | 2194 | 59    | 2,689152233 | 8g0000050.1   | 2194 | -77,5 | -3,532360985 |
| 8g0000180.1   | Cutinase                                                                | 967  | 63   | 6,514994829 | 8g0000180.1   | 967  | -32    | -3,309203723 | 8g0000180.1   | 967  | 10    | 1,034126163 | 8g0000180.1   | 967  | -17,5 | -1,809720786 |
| 8g0000310.1   | Nicotianamine synthase                                                  | 1309 | 27   | 2,062643239 | 8g0000310.1   | 1309 | -61    | -4,660045837 | 8g0000310.1   | 1309 | 16,5  | 1,260504202 | 8g0000310.1   | 1309 | -24,5 | -1,871657754 |
| 8g0000370.1   | Ribosomal RNA large subunit methyltransferase E                         | 466  | 22,5 | 4,82832618  | 8g0000370.1   | 466  | -7     | -1,502145923 | 8g0000370.1   | 466  | 11    | 2,360515022 | 8g0000370.1   | 466  | -24,5 | -5,25751073  |
| 8g0000420.1   | ATP synthase subunit alpha                                              | 509  | 23   | 4,518664047 | 8g0000420.1   | 509  | -33    | -6,483300589 | 8g0000420.1   | 509  | 9,5   | 1,866404715 | 8g0000420.1   | 509  | -13   | -2,554027505 |
| 904g0000030.1 | CAP-Gly domain-containing linker protein 4                              | 847  | 10,5 | 1,239669422 | 904g0000030.1 | 847  | -27,5  | -3,246753247 | 904g0000030.1 | 847  | 46,5  | 5,489964581 | 904g0000030.1 | 847  | -23   | -2,715466352 |
| 918g0000010.1 | Transcriptional regulator of yeast form adherence 3                     | 1982 | 41   | 2,068617558 | 918g0000010.1 | 1982 | -53    | -2,674066599 | 918g0000010.1 | 1982 | 66    | 3,329969728 | 918g0000010.1 | 1982 | -25,5 | -1,286579213 |
| 91g0000070.1  | WD repeat-containing protein 1                                          | 3284 | 43,5 | 1,324604141 | 91g0000070.1  | 3284 | -171,5 | -5,22228989  | 91g0000070.1  | 3284 | 84,5  | 2,573081608 | 91g0000070.1  | 3284 | -89   | -2,710109622 |
| 925g0000010.1 | Meiotically up-regulated gene 9 protein                                 | 1651 | 40   | 2,422774076 | 925g0000010.1 | 1651 | -72,5  | -4,391278013 | 925g0000010.1 | 1651 | 43,5  | 2,634766808 | 925g0000010.1 | 1651 | -38,5 | -2,331920049 |
| 92g0000170.1  | Unknown protein                                                         | 786  | 27,5 | 3,498727735 | 92g0000170.1  | 786  | -25    | -3,180661578 | 92g0000170.1  | 786  | 34,5  | 4,389312977 | 92g0000170.1  | 786  | -45   | -5,72519084  |
| 932g0000010.1 | Solute carrier family 2, facilitated glucose transporter member 2       | 1952 | 37,5 | 1,921106557 | 932g0000010.1 | 1952 | -73    | -3,739754098 | 932g0000010.1 | 1952 | 38    | 1,946721312 | 932g0000010.1 | 1952 | -28,5 | -1,460040984 |
| 944g0000020.1 | Protein VTS1                                                            | 2006 | 23,5 | 1,171485543 | 944g0000020.1 | 2006 | -128   | -6,380857428 | 944g0000020.1 | 2006 | 25,5  | 1,271186441 | 944g0000020.1 | 2006 | -69,5 | -3,464606182 |
| 957g0000030.1 | Esterase                                                                | 1882 | 98   | 5,207226355 | 957g0000030.1 | 1882 | -98,5  | -5,233793836 | 957g0000030.1 | 1882 | 41,5  | 2,205100956 | 957g0000030.1 | 1882 | -26,5 | -1,408076514 |
| 95g0000040.1  | 50S ribosomal protein L21                                               | 932  | 40   | 4,291845494 | 95g0000040.1  | 932  | -36,5  | -3,916309013 | 95g0000040.1  | 932  | 12,5  | 1,341201717 | 95g0000040.1  | 932  | -26   | -2,789699571 |
| 95g0000170.1  | 1D-myo-inositol 2-acetamido-2-deoxy-alpha-D-glucopyranoside deacetylase | 450  | 15,5 | 3,444444444 | 95g0000170.1  | 450  | -15,5  | -3,444444444 | 95g0000170.1  | 450  | 21,5  | 4,777777778 | 95g0000170.1  | 450  | -6    | -1,333333333 |
| 95g0000230.1  | ATP-dependent RNA helicase DHX8                                         | 2791 | 52,5 | 1,88104622  | 95g0000230.1  | 2791 | -125,5 | -4,496596202 | 95g0000230.1  | 2791 | 69    | 2,472232175 | 95g0000230.1  | 2791 | -64   | -2,293084916 |
| 965g0000020.1 | Unknown protein                                                         | 789  | 85   | 10,77313055 | 965g0000020.1 | 789  | -51    | -6,463878327 | 965g0000020.1 | 789  | 39,5  | 5,006337136 | 965g0000020.1 | 789  | -38,5 | -4,879594423 |
| 97g0000010.1  | Nucleoporin GLE1                                                        | 1709 | 24,5 | 1,433586893 | 97g0000010.1  | 1709 | -122,5 | -7,167934465 | 97g0000010.1  | 1709 | 39,5  | 2,311293154 | 97g0000010.1  | 1709 | -30,5 | -1,784669397 |
| 97g0000090.1  | Unconventional myosin-XV                                                | 1274 | 33   | 2,590266876 | 97g0000090.1  | 1274 | -93    | -7,299843014 | 97g0000090.1  | 1274 | 27    | 2,119309262 | 97g0000090.1  | 1274 | -16   | -1,25588697  |
| 97g0000140.1  | DNA-directed RNA polymerase subunit beta                                | 334  | 55,5 | 16,61676647 | 97g0000140.1  | 334  | -16,5  | -4,940119761 | 97g0000140.1  | 334  | 12,5  | 3,74251497  | 97g0000140.1  | 334  | -24   | -7,185628743 |
| 97g0000160.1  | U3 small nucleolar RNA-associated protein 13                            | 2824 | 38   | 1,345609065 | 97g0000160.1  | 2824 | -209   | -7,400849858 | 97g0000160.1  | 2824 | 106,5 | 3,771246459 | 97g0000160.1  | 2824 | -63,5 | -2,248583569 |
| 987g0000030.1 | Unknown protein                                                         | 1220 | 14,5 | 1,18852459  | 987g0000030.1 | 1220 | -57,5  | -4,713114754 | 987g0000030.1 | 1220 | 39    | 3,196721312 | 987g0000030.1 | 1220 | -13   | -1,065573771 |
| 996g0000010.1 | Unknown protein                                                         | 952  | 82,5 | 8,665966387 | 996g0000010.1 | 952  | -42    | -4,411764706 | 996g0000010.1 | 952  | 41,5  | 4,359243698 | 996g0000010.1 | 952  | -30,5 | -3,203781513 |
| 99g0000050.1  | Unknown protein                                                         | 1715 | 22,5 | 1,311953353 | 99g0000050.1  | 1715 | -107,5 | -6,268221574 | 99g0000050.1  | 1715 | 46    | 2,682215743 | 99g0000050.1  | 1715 | -23,5 | -1,370262391 |
| 99g0000140.1  | Unknown protein                                                         | 475  | 56,5 | 11,89473684 | 99g0000140.1  | 475  | -14,5  | -3,052631579 | 99g0000140.1  | 475  | 20    | 4,210526316 | 99g0000140.1  | 475  | -6    | -1,263157895 |
| 9g0000220.1   | Unknown protein                                                         | 2602 | 41,5 | 1,594926979 | 9g0000220.1   | 2602 | -79    | -3,036126057 | 9g0000220.1   | 2602 | 51,5  | 1,979246733 | 9g0000220.1   | 2602 | -36   | -1,383551115 |
| 9g0000240.1   | Unknown protein                                                         | 764  | 35,5 | 4,646596859 | 9g0000240.1   | 764  | -41    | -5,366492147 | 9g0000240.1   | 764  | 25,5  | 3,337696335 | 9g0000240.1   | 764  | -26,5 | -3,468586387 |





**Figure S1** Mapping efficiency of bisulfite treated PE reads with its own genome.

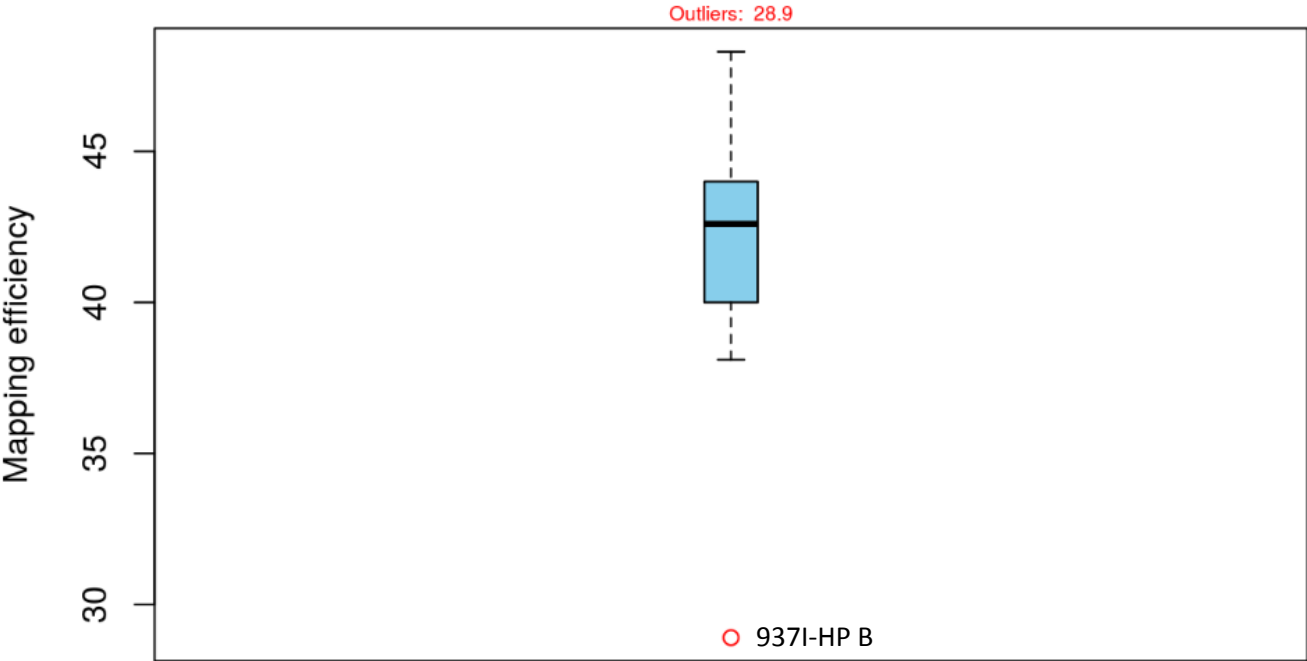

**Figure S2** GO term analysis of the 831 genes selected.

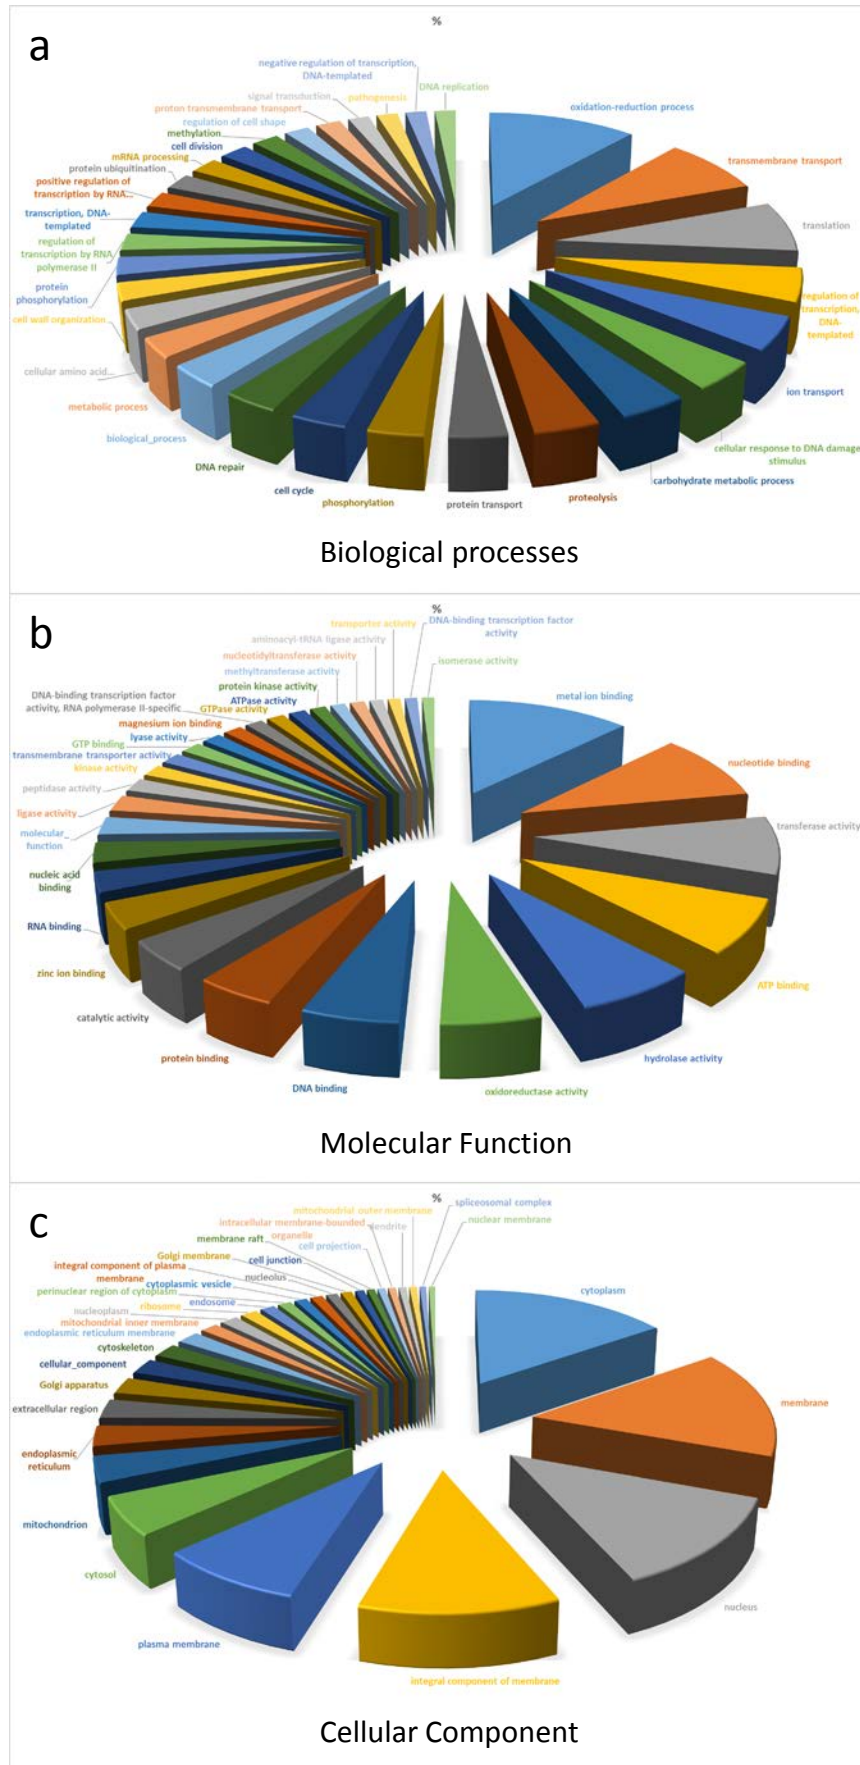

Supplement: ijms-21-05197-s001.pdf [file ijms-21-05197-s001.pdf]
